# Supplementary material for: Electrochemical oxidation of lignin model compounds over metal oxyhydroxides on nickel foam
Source: Royal Society of Chemistry journal article supplement (doi:10.1039/d4gc02156h), 2024-01-01
Supplement: d4gc02156h1.pdf [file d4gc02156h1.pdf]

## **Supporting information**

### **Electrochemical oxidation of lignin model compounds over metal oxyhydroxides on nickel foam**

Zhang Danlu, Zeng Xu, Wang Sinong, Xu Yan, Dai Qiqi, Yue Fengxia, Wang Peng,  
Liu Chuanfu, Lan Wu\*

## Content

1. Synthesis of  $\beta$ -O-4 lignin dimer models Fig. S1-S4
2. Digital photo of catalysts Fig. S5
3. Electrochemical measurement Fig. S6-S10
4. GCMS chromatograms of the products Fig. S11-S20
5. Types of lignin models and products Fig. S21-S22
6. Summary of degradation results Table S1-S2
7. Computational method
8.  $^1\text{H-NMR}$  and  $^{13}\text{C-NMR}$  Fig. S23
9. References

## Preparation of $\beta$ -O-4 lignin dimer models

The  $\beta$ -O-4 lignin dimeric model compounds were prepared according to the reference <sup>1</sup>. The non-phenolic  $\beta$ -O-4 dimer model materials VG and TG were started with non-phenolic ketones. They are prepared by Bromination, Etherification, Aldol condensation and Carbonyl reduction.

Phenolic  $\beta$ -O-4 dimer models GG and SS were initiated by Benzoylation of phenolic ketones to protect hydroxyl groups. Then Bromination, Etherification, Aldol condensation, Carbonyl reduction and debenzyl Debenzylation were carried out successively.

The synthesis routes of different lignin  $\beta$ -O-4 dimer models are as follows.

**Fig. S1** The synthetic route of VG.

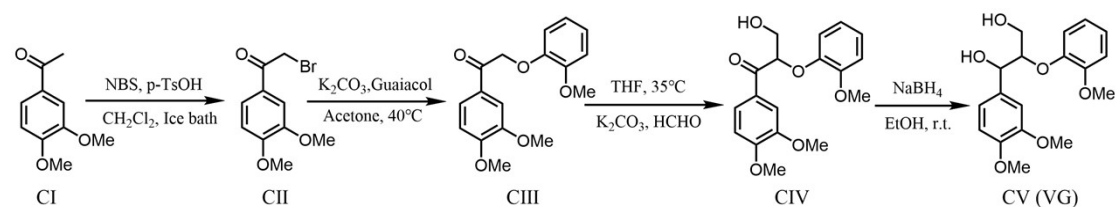

**Fig. S2** The synthetic route of TG.

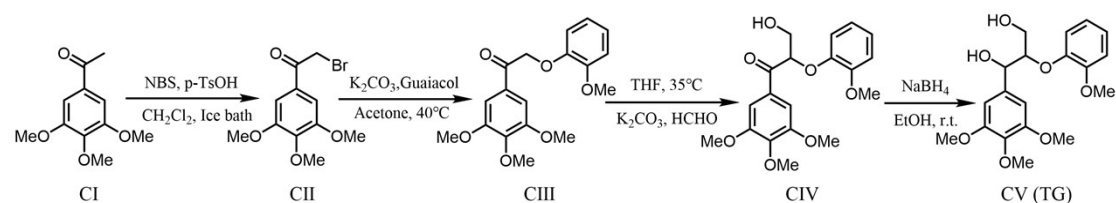

**Fig. S3** The synthetic route of GG.

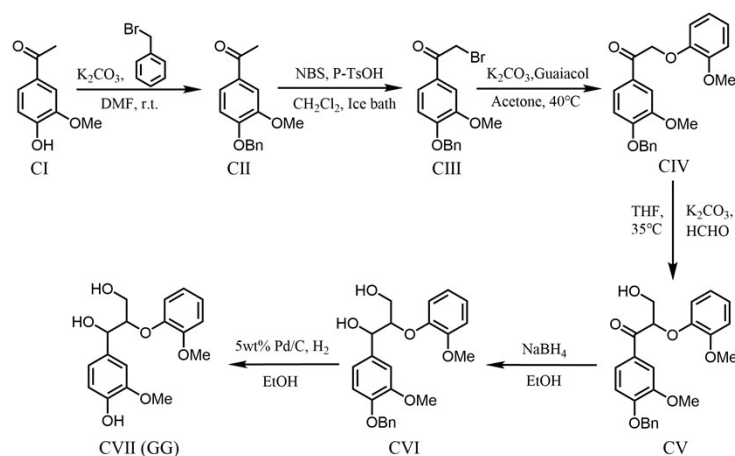

**Fig. S4** The synthetic route of SS.

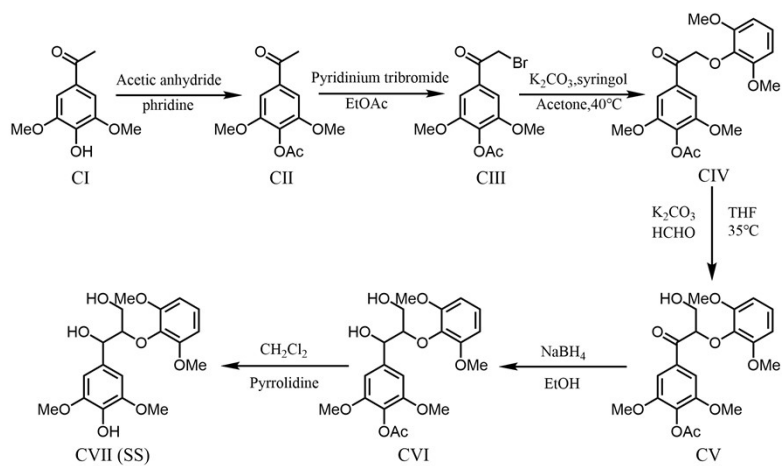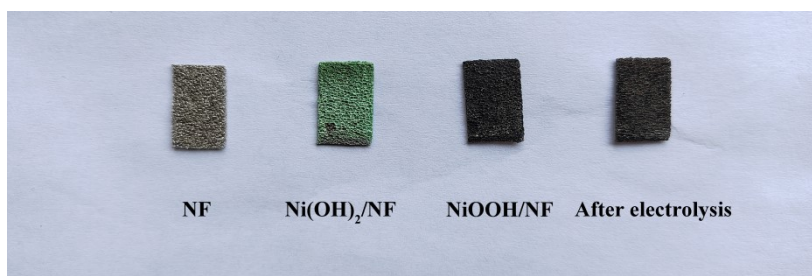

**Fig. S5** A digital photo of NF, Ni(OH)<sub>2</sub>/NF and NiOOH/NF before and after nine hours of electrolysis.

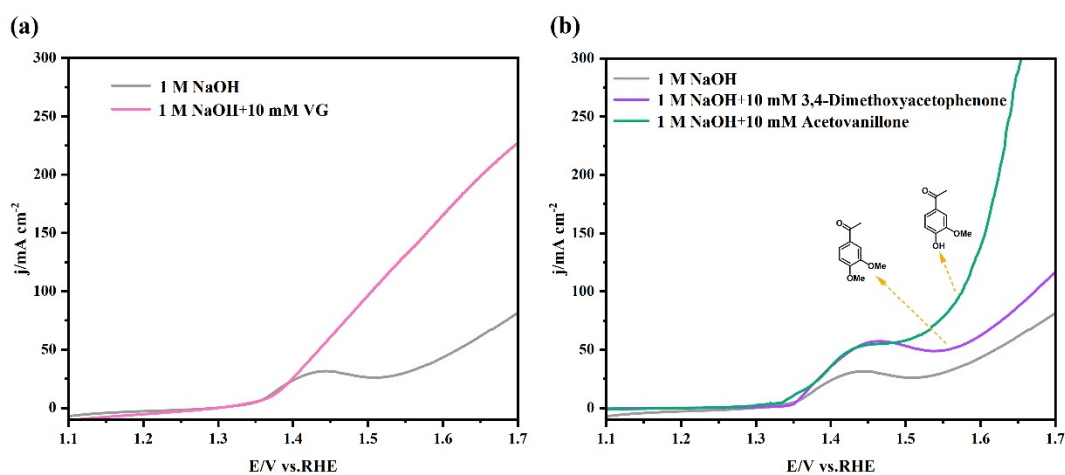

**Fig. S6** LSV curve of NiOOH/NF in 1 M NaOH solution with (a) 10 mM VG, (b) 10 mM 3,4-dimethoxyacetophenone and 10 mM acetovanillone.

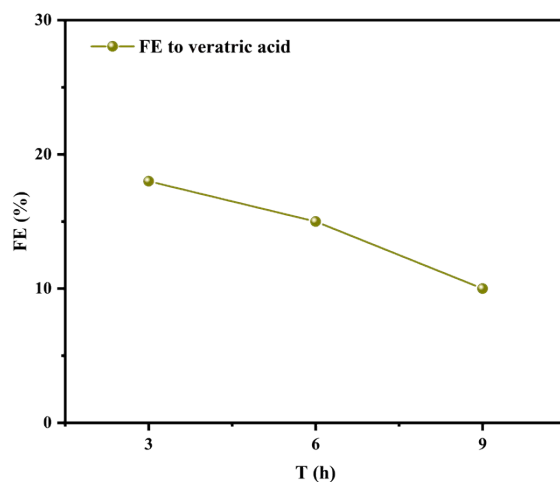

**Fig. S7** Faradic efficiency (FE) to veratric acid as the function of reaction time. (Suppose the first reaction path of Fig. 8 is followed, the number of transferred electrons is 8)

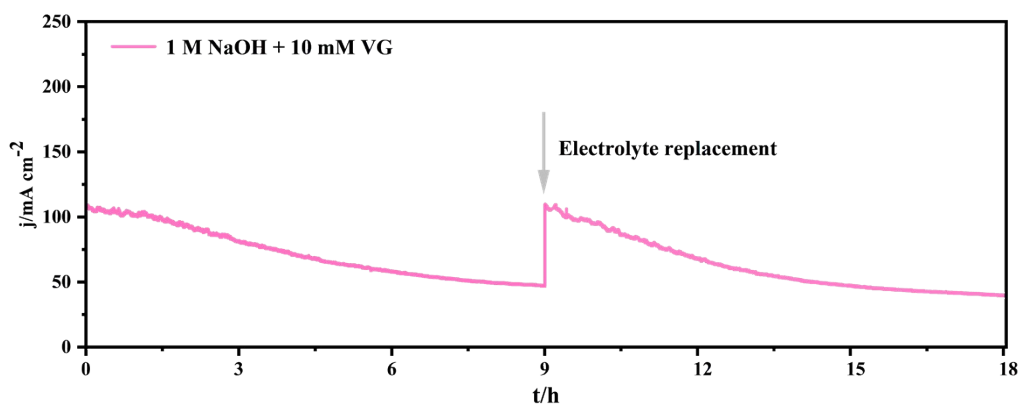

**Fig. S8** i-t curves of NiOOH/NF for VG (10mM in 1 M NaOH) oxidation at 1.6 V.

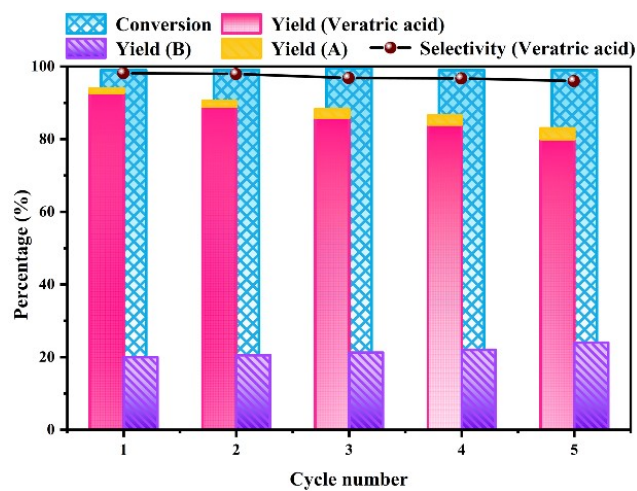

**Fig. S9** Catalyst cyclability test.

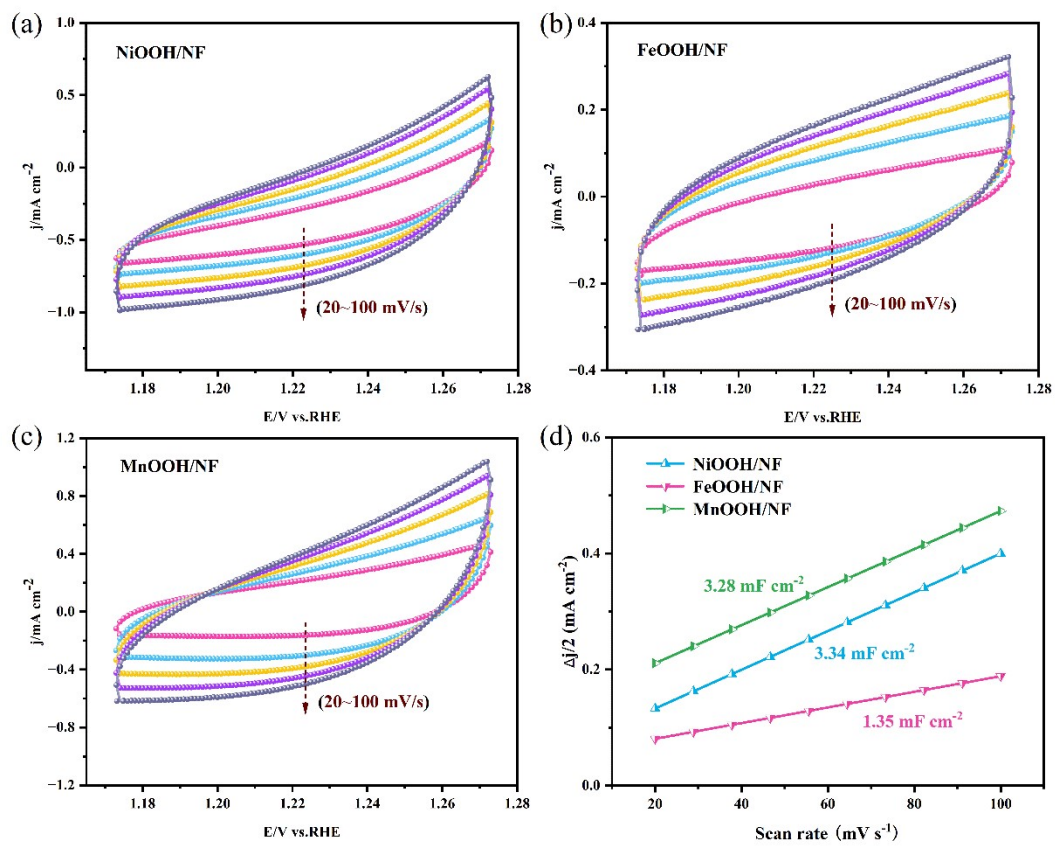

**Fig. S10** (a-c) CV cycle curves at different scanning rates. (d) The calculated double-layer capacitance ( $C_{dl}$ ).

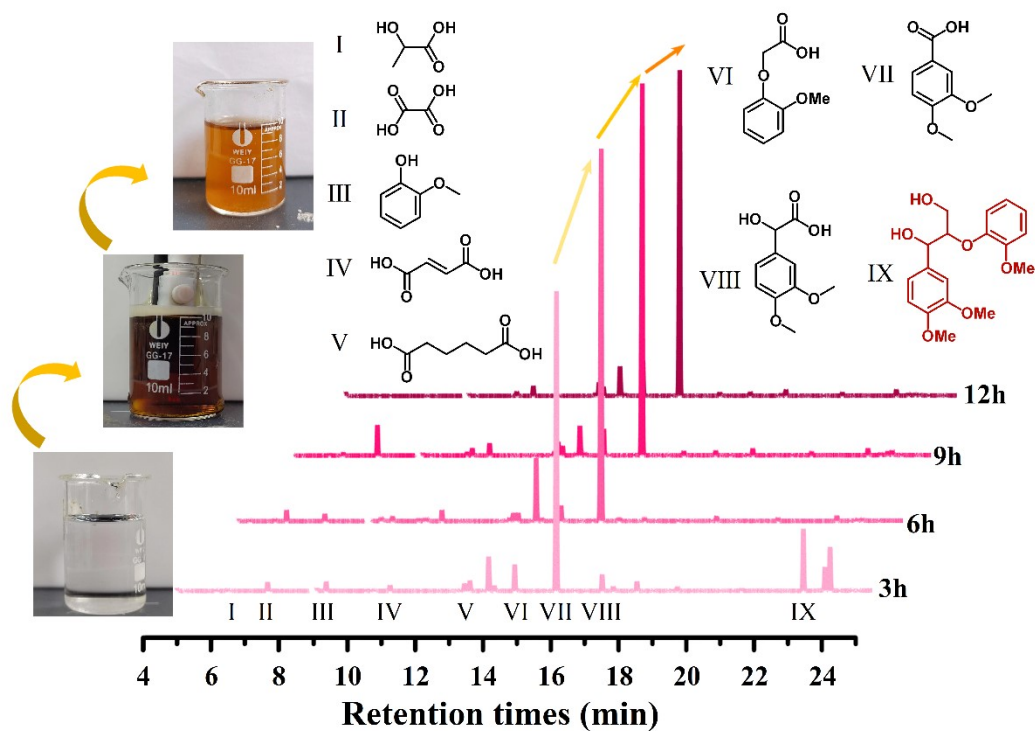

**Fig. S11** GCMS chromatograms of the products after electrocatalytic oxidation of VG and the color of the solution changes during electrolysis.

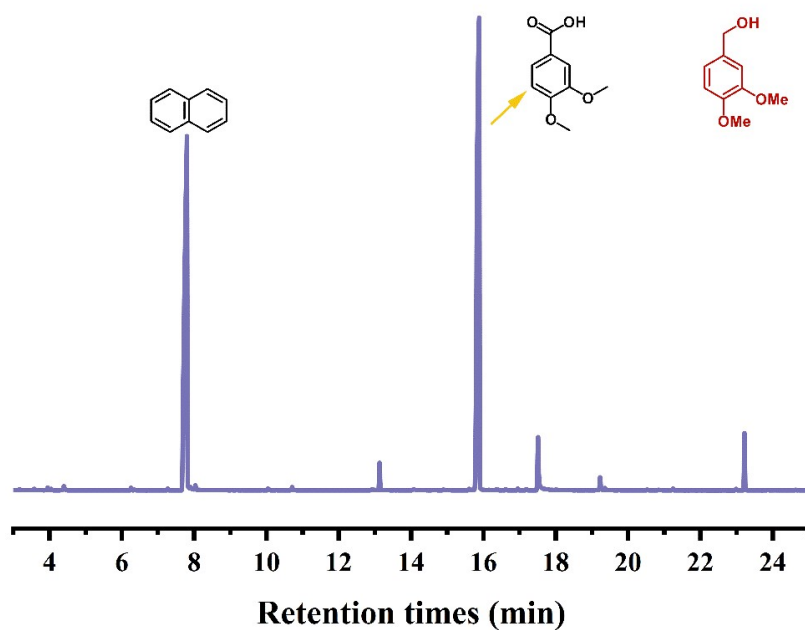

**Fig. S12** GCMS chromatogram of the products after electrocatalytic oxidation of veratryl alcohol.

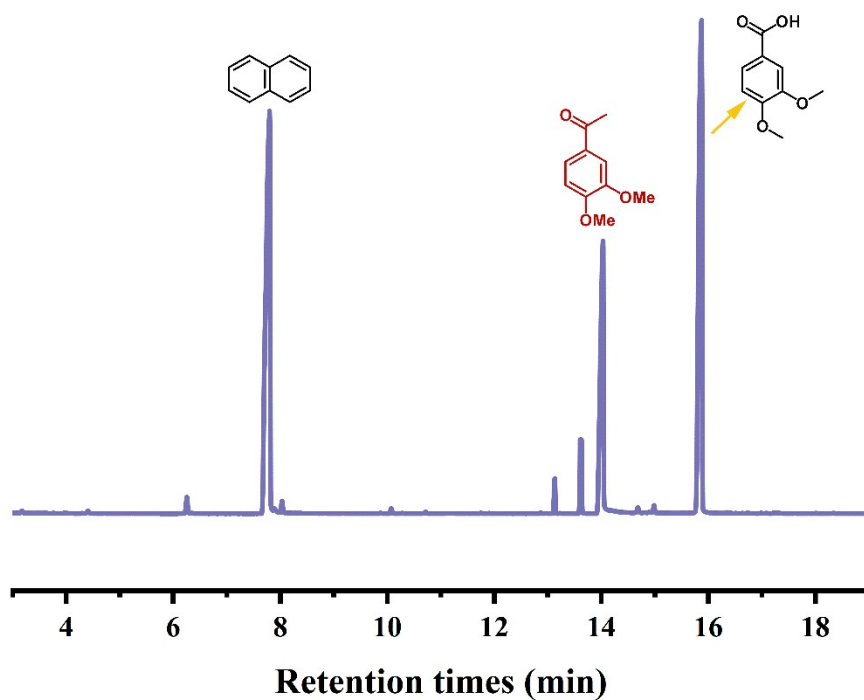

**Fig. S13** GCMS chromatogram of the products after electrocatalytic oxidation of 3,4-dimethoxyacetophenone.

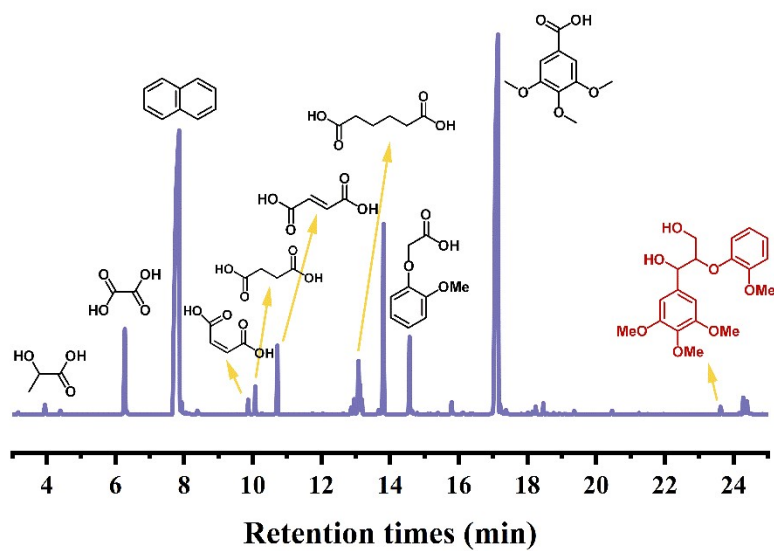

**Fig. S14** GCMS chromatogram of the products after electrocatalytic oxidation of TG.



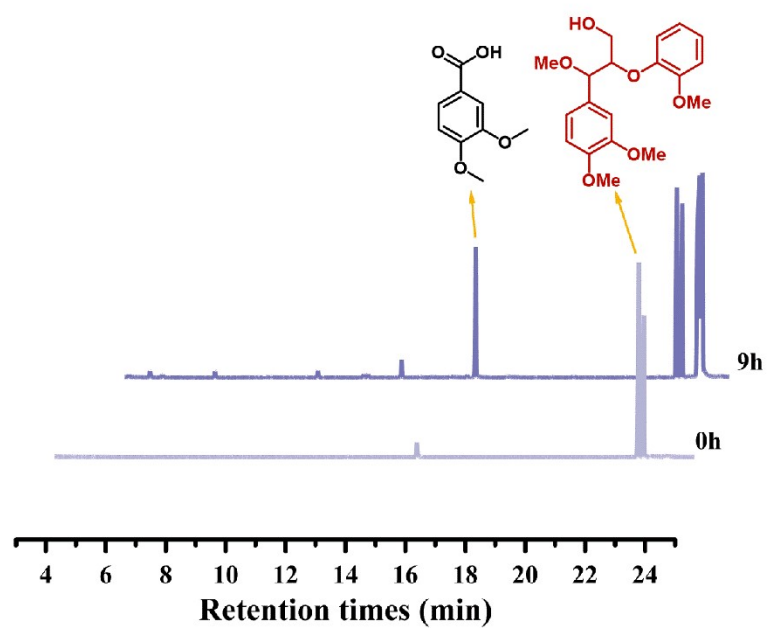

**Fig. S15** GCMS chromatogram of the products after electrocatalytic oxidation of  $\alpha$ -methylated VG.

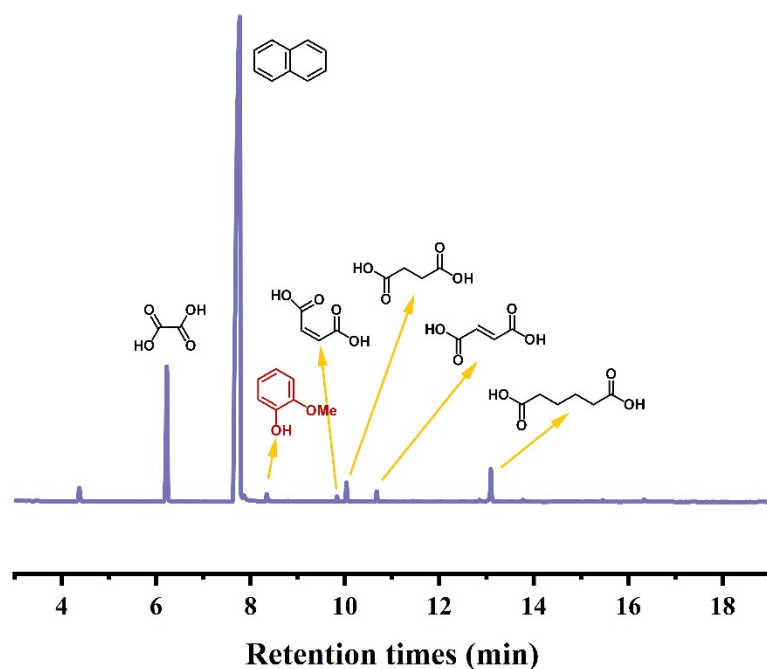

**Fig. S16** GCMS chromatogram of the products after electrocatalytic oxidation of guaiacol.

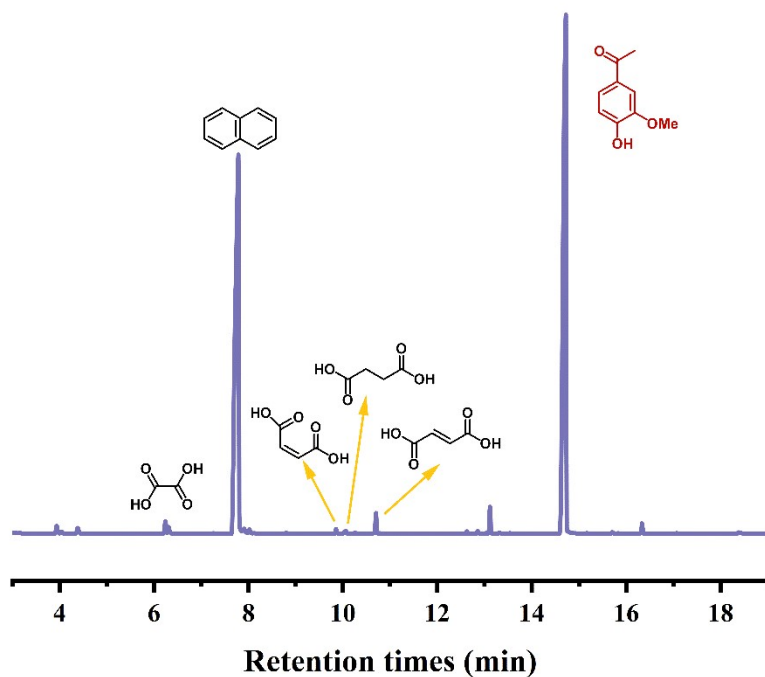

**Fig. S17** GCMS chromatogram of the products after electrocatalytic oxidation of acetovanillone.

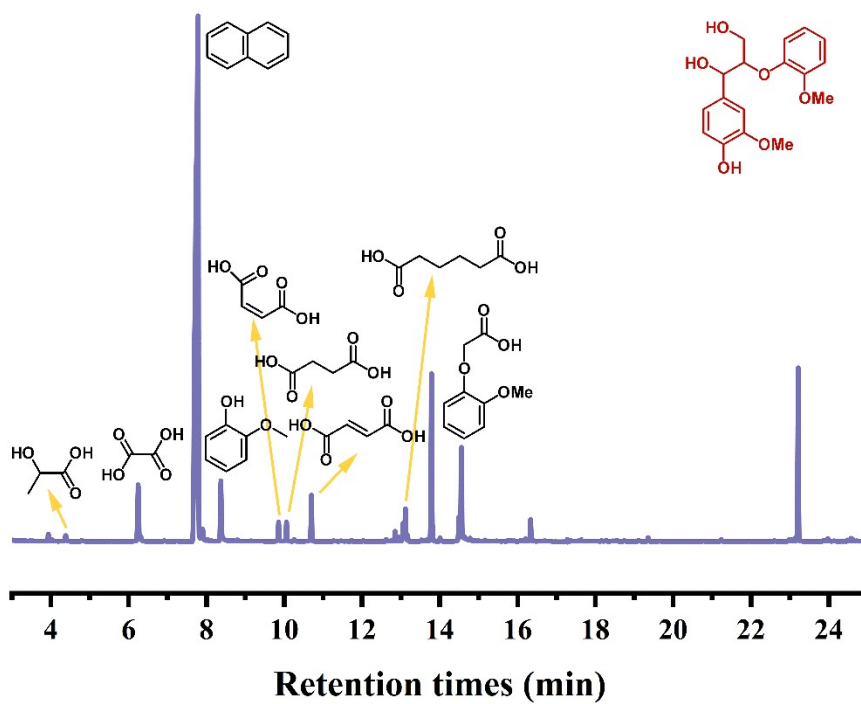

**Fig. S18** GCMS chromatogram of the products after electrocatalytic oxidation of GG.

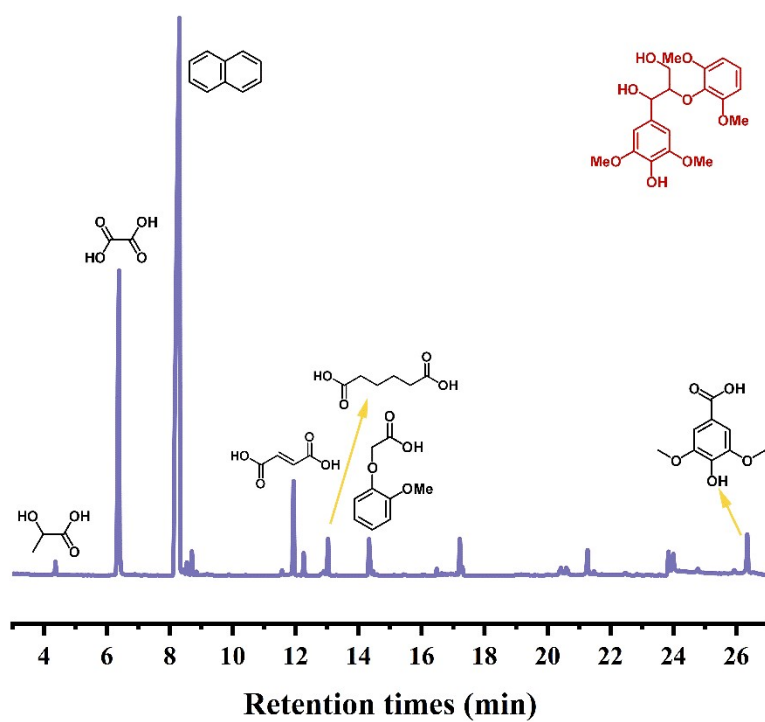

**Fig. S19** GCMS chromatogram of the products after electrocatalytic oxidation of SS.

**Fig. S20** Mass spectrograms of all products.



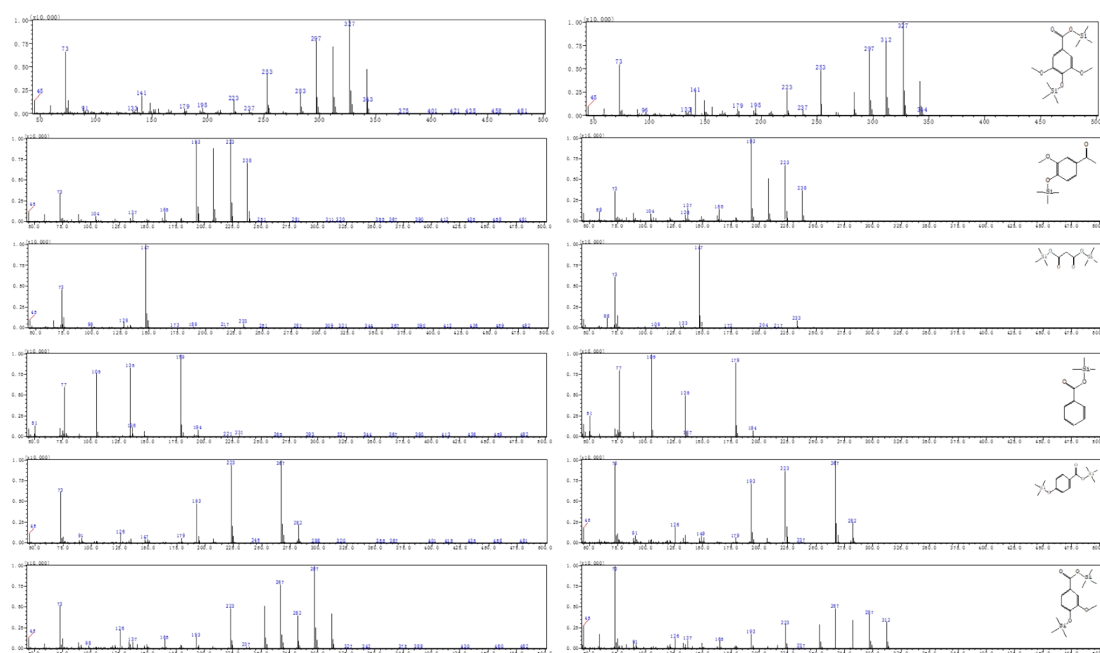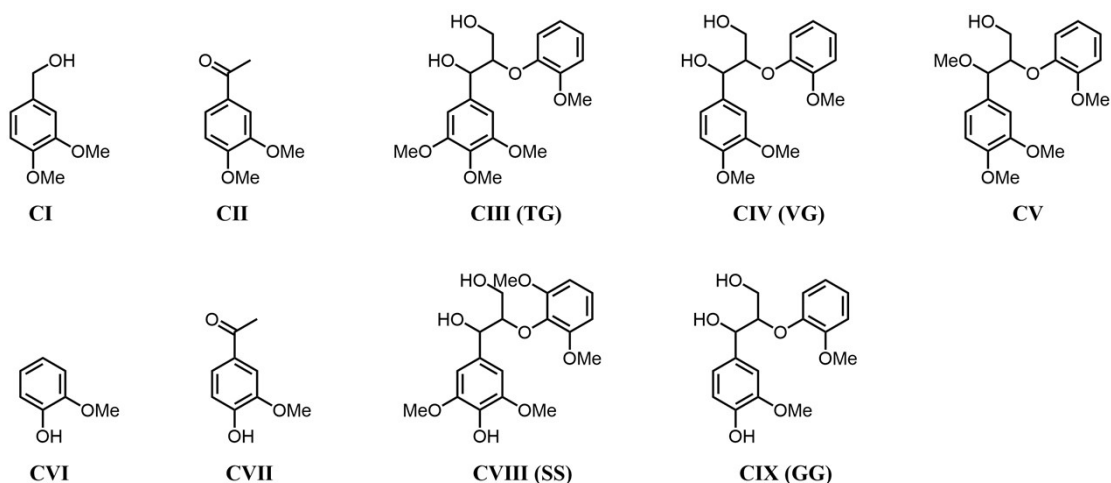

**Fig. S21** Types of lignin models.

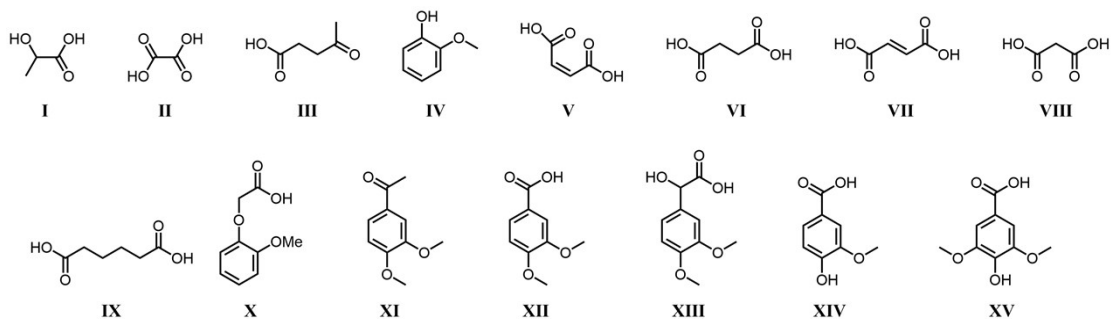

**Fig. S22** Types of electrocatalytic degradation products.

**Table S1** Summary of degradation results of non-phenolic lignin models.

| Non-phenolic substrate | Time (h) | Product yield (%) |     |     |    |     |     |     |     |     |     |      |      |      |  | Yield A (%) | Yield B (%) | Conv (%) |     |
|------------------------|----------|-------------------|-----|-----|----|-----|-----|-----|-----|-----|-----|------|------|------|--|-------------|-------------|----------|-----|
|                        |          | I                 | II  | III | IV | V   | VI  | VII | IX  | X   | XI  | XII  | XIII | VG   |  |             |             |          |     |
| CI                     | 3        |                   |     |     |    |     |     |     |     |     |     | 80.0 |      |      |  |             | 80          | 95       |     |
| CII                    | 9        |                   |     |     |    |     |     |     |     |     |     | 44.4 |      |      |  |             | 44          | 57       |     |
| CIII                   | 9        | 0.5               | 7.8 | 0.3 |    | 1.1 | 1.4 | 4.7 | 1.8 | 2.8 |     | 92.0 |      |      |  |             | 20          | 92       | 100 |
| CIV                    | 9        | 0.6               | 6.3 |     |    | 0.4 | 2.4 | 1.7 | 6.3 | 2.8 | 1.0 | 92.7 | 0.6  |      |  |             | 20          | 94       | 100 |
| CV                     | 9        |                   |     |     |    |     |     |     |     |     |     | 8.3  |      | 14.5 |  |             | 23          | 30       |     |

**Table S2** Summary of degradation results of phenolic lignin models.

| Phenolic substrate | Time (h) | Product yield (%) |      |     |     |     |     |     |     |      |     |     |     | Yield (%) | Conv (%) |    |     |
|--------------------|----------|-------------------|------|-----|-----|-----|-----|-----|-----|------|-----|-----|-----|-----------|----------|----|-----|
|                    |          | I                 | II   | III | IV  | V   | VI  | VII | XV  | VIII | IX  | X   | XIV |           |          |    |     |
| CVI                | 6        | 0.7               | 3.8  |     | 0.3 | 0.1 | 0.3 | 0.3 |     | 0.2  | 1.3 |     |     |           |          | 6  | 100 |
| CVII               | 6        | 1.5               | 12.3 | 0.3 |     | 0.2 | 0.6 | 0.5 |     | 0.2  | 2.5 |     |     |           |          | 17 | 99  |
| CVIII              | 9        | 1.4               | 36.3 | 0.5 |     | 0.2 | 4.3 | 1.1 | 1.1 |      | 0.3 |     |     |           |          | 45 | 94  |
| CIX                | 9        | 0.3               | 8.0  | 0.3 | 1.6 | 2.4 | 1.3 | 2.0 |     | 0.4  | 3.5 | 2.1 | 0.8 |           |          | 23 | 99  |

## **Computational method**

The study used VASP to perform density functional theory calculations with projector augmented wave. Electron spin polarization were considered in all calculations. The Perdew-Burke-Ernzerhof functional was employed for exchange-correlation effects, while DFT+D3 was used for handling weak interactions. The cut-off energy for the plane-wave basis was 450 eV. K-points were 2\*2\*1 in the Brillouin zone. 15 Å of layer vacuum was applied at Z-axis of slab models to avoid the Periodic effect. Energy and maximum stress were converged to  $10^{-5}$  eV and 0.02 eV/Å, respectively.

**Fig. S23** The  $^1\text{H-NMR}$  and  $^{13}\text{C-NMR}$  of the synthesized models .

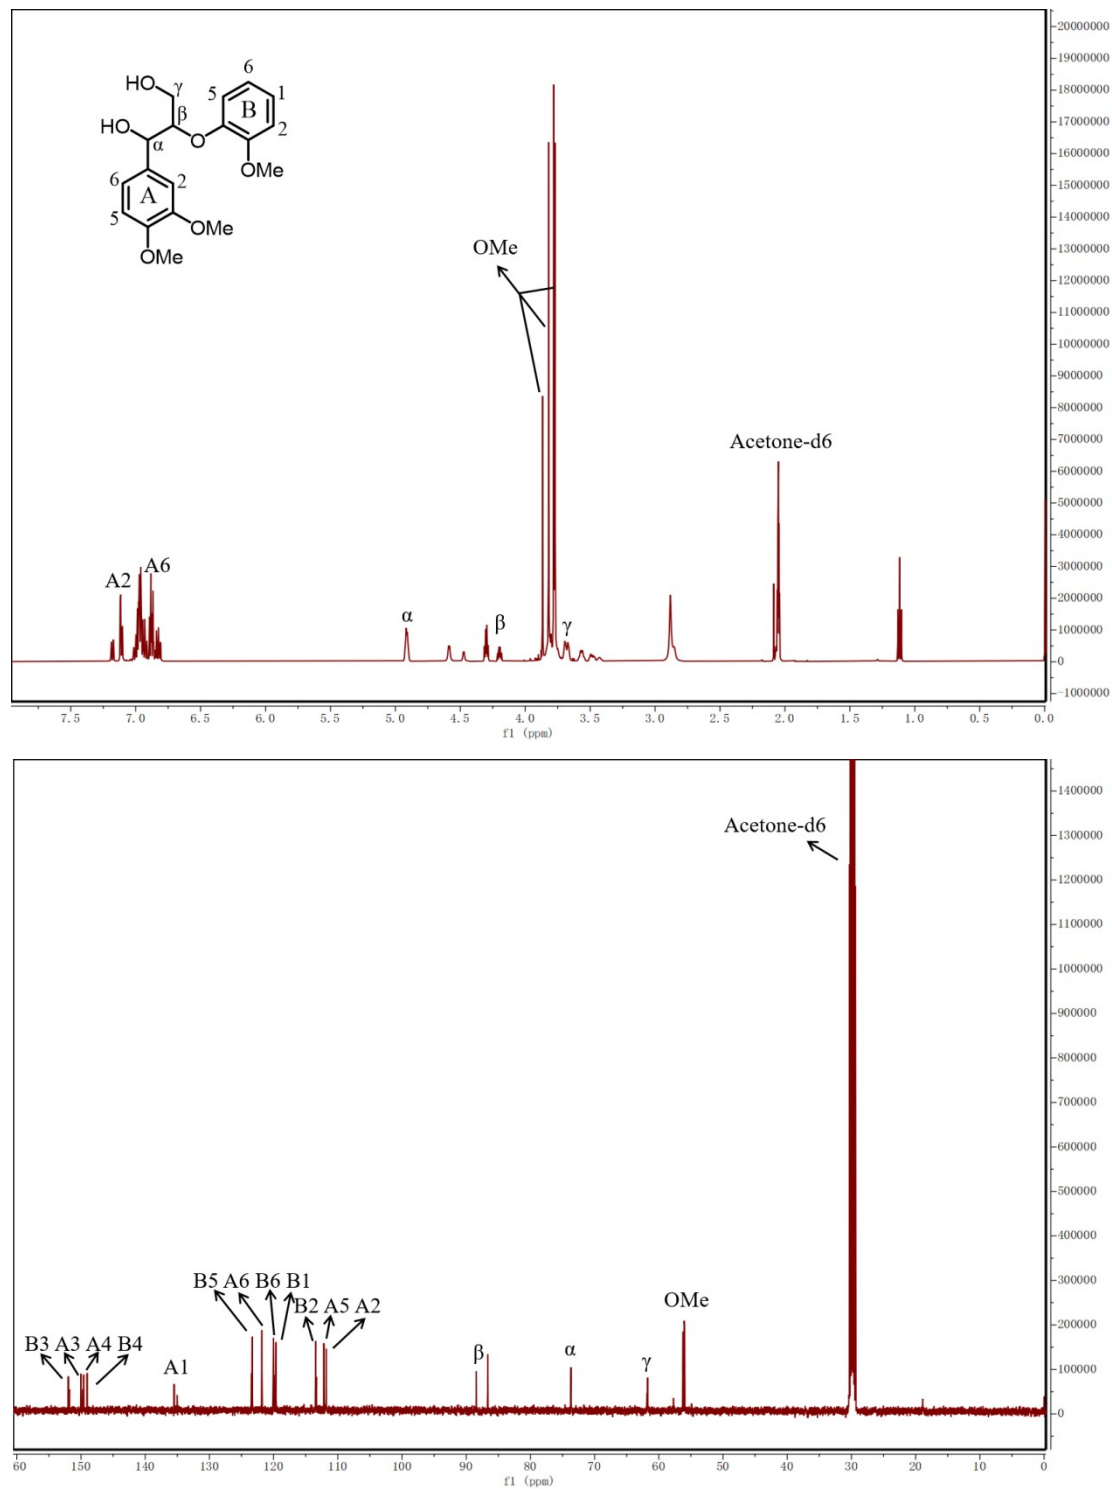



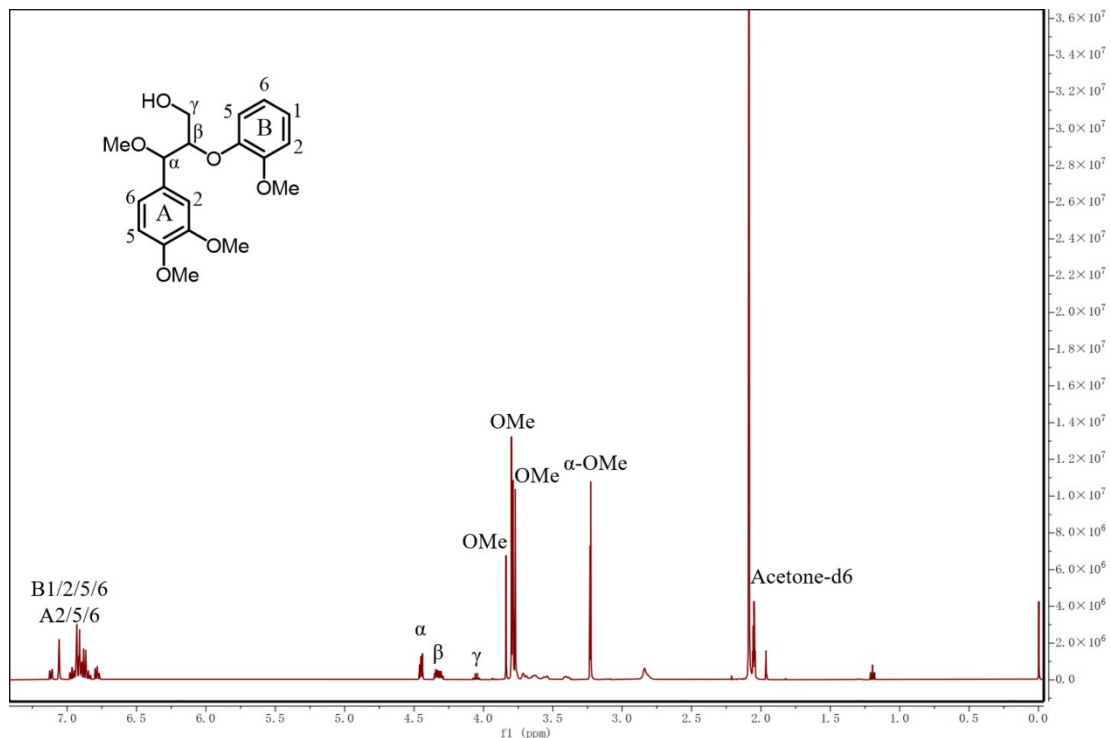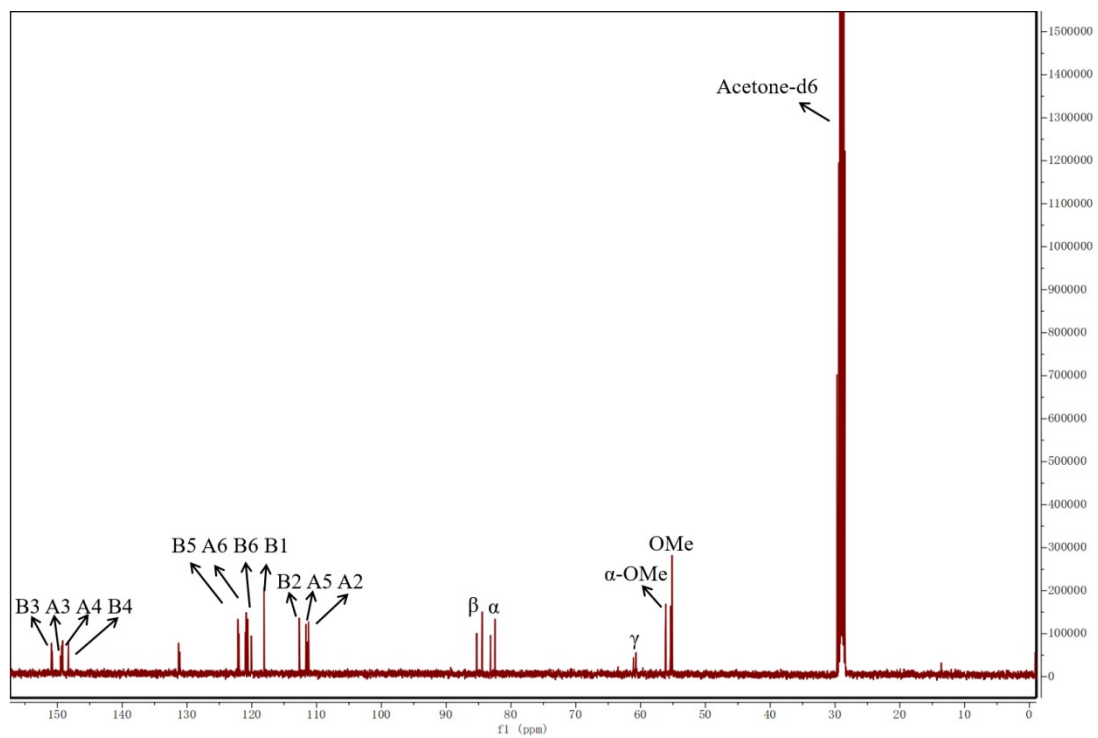

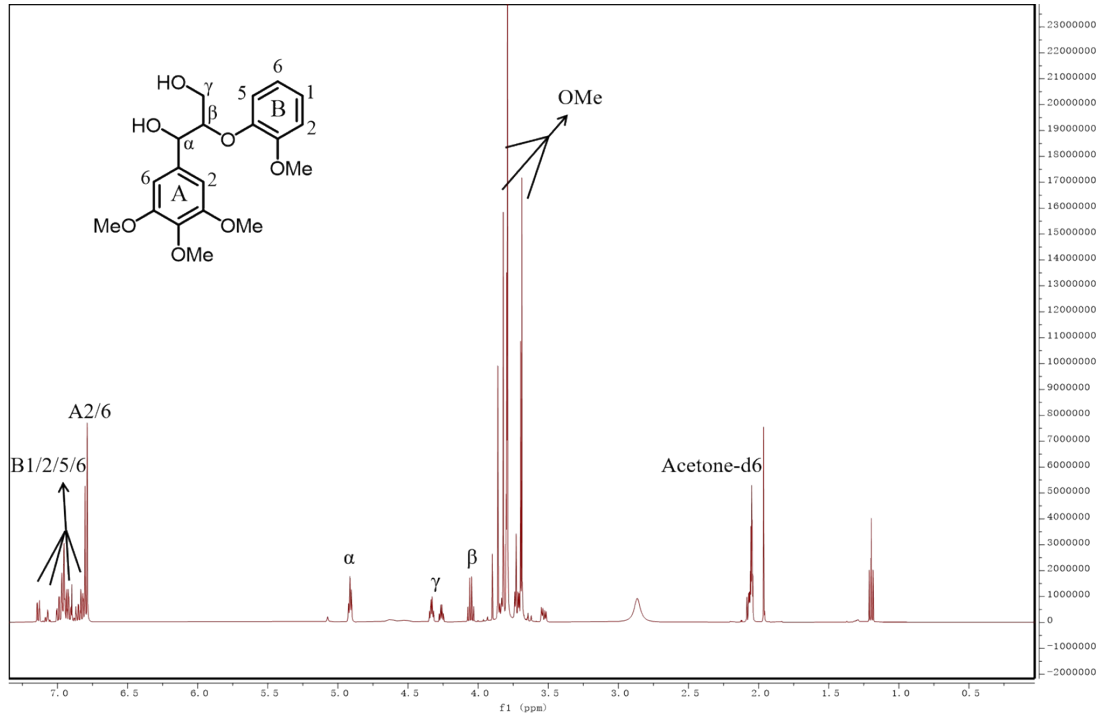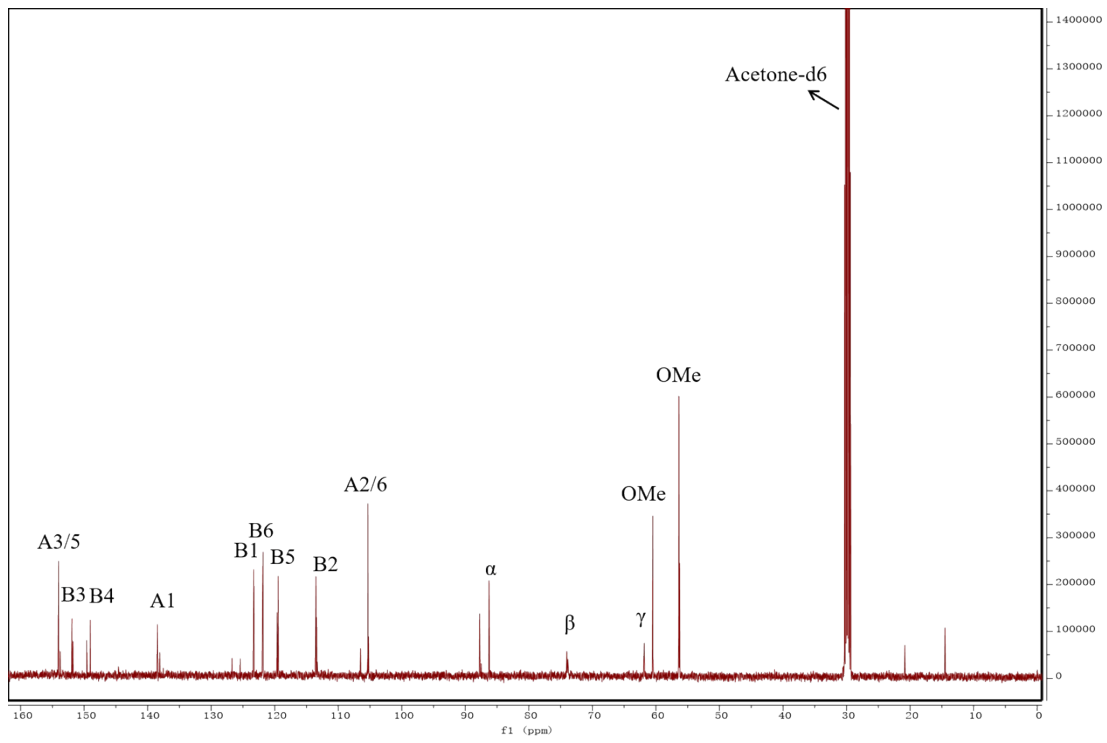

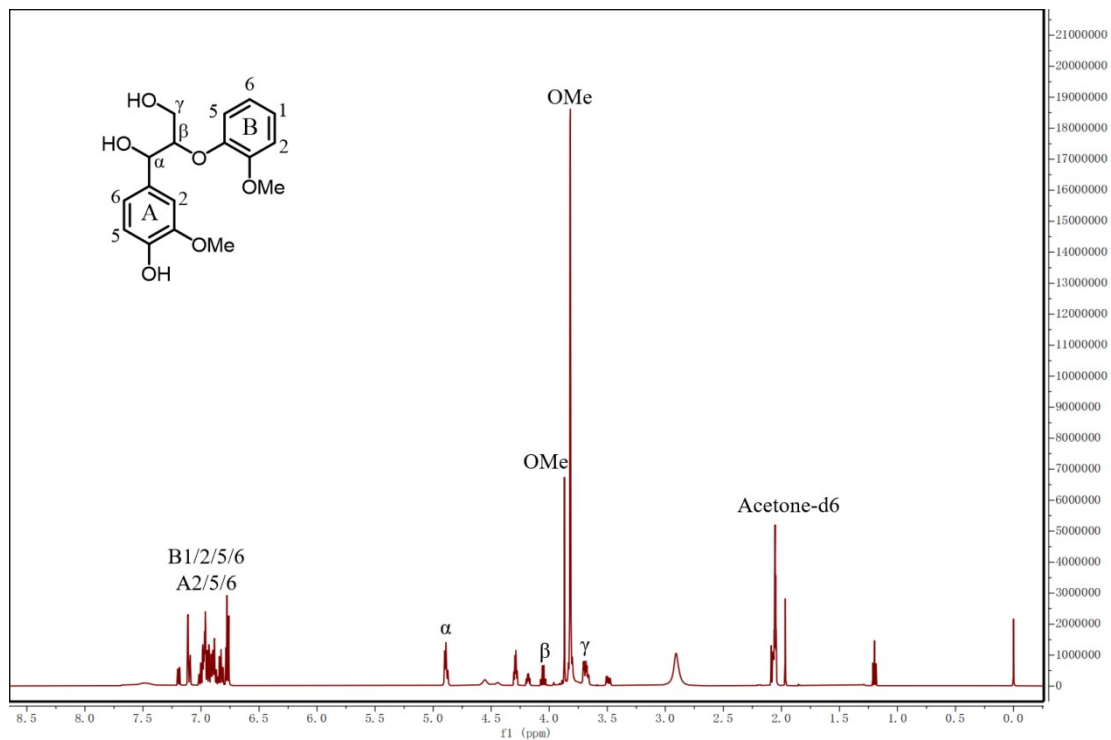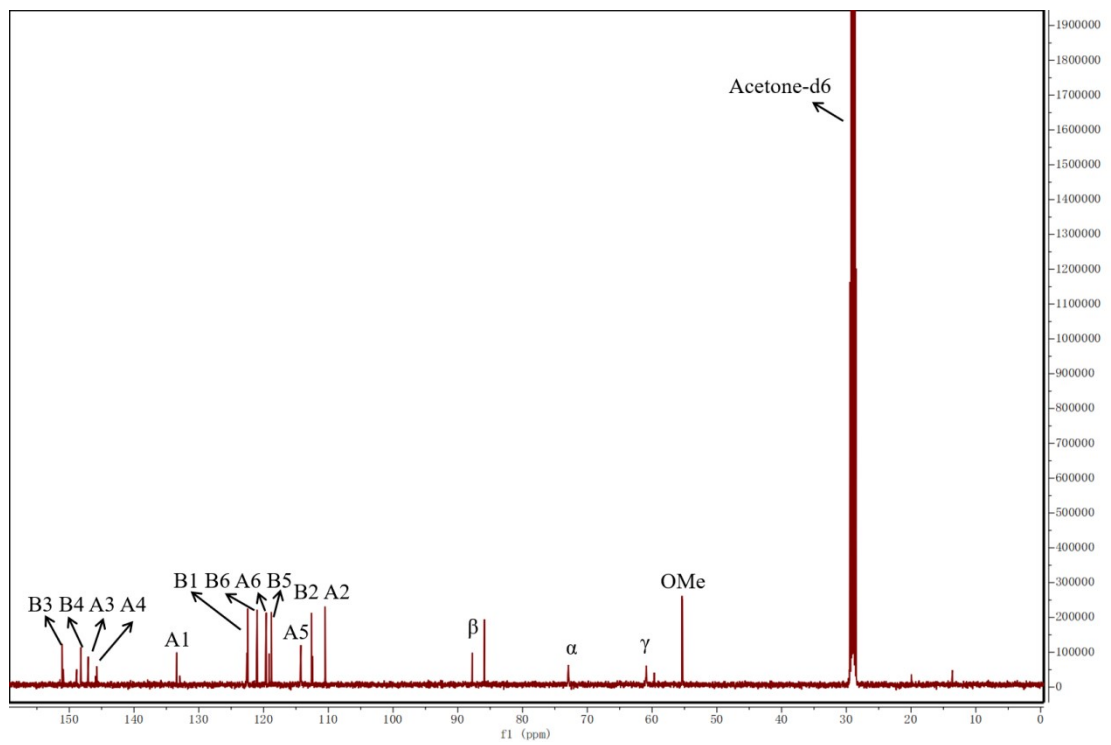

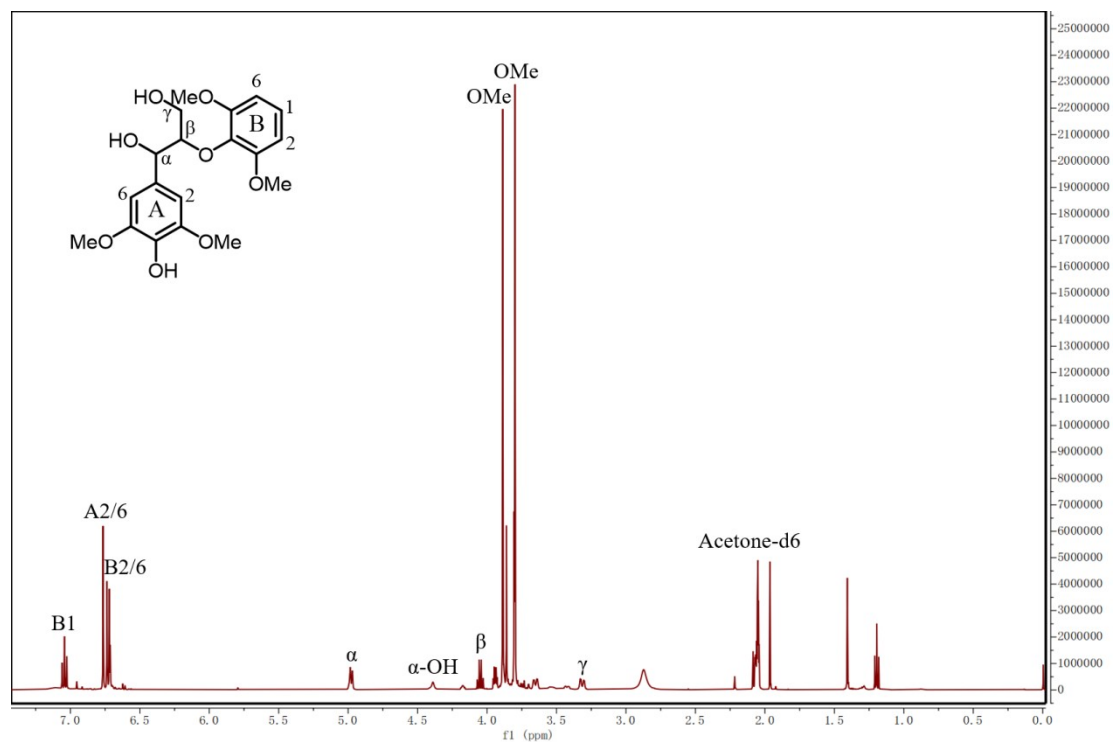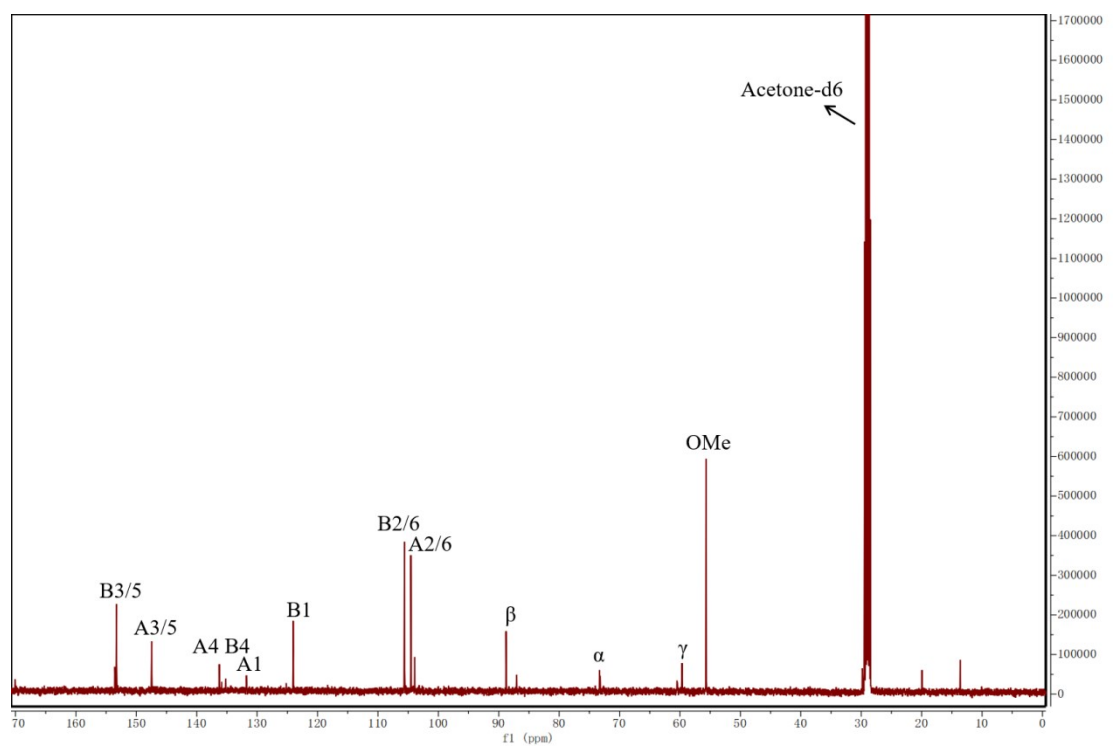

1. S. Kawai, K. Okita, K. Sugishita, A. Tanaka and H. Ohashi, *Journal of wood science*, 1999, **45**, 440-443.
